# Supplementary material for: Thyroid Hormones in Relation to Lead, Mercury, and Cadmium Exposure in the National Health and Nutrition Examination Survey, 2007–2008
Source: PubMed Central journal article supplement (PMC3569681; doi:10.1289/ehp.1205239), 2012-11-16
Supplement: ehp.1205239.s001.pdf [file ehp.1205239.s001.pdf]

## Supplemental Material

### **Thyroid Hormones in Relation to Lead, Mercury, and Cadmium Exposure in the National Health and Nutrition Examination Survey, 2007–2008**

Aimin Chen<sup>1</sup>, Stephani S. Kim<sup>1</sup>, Ethan Chung<sup>1</sup>, Kim N. Dietrich<sup>1</sup>

<sup>1</sup>Division of Epidemiology and Biostatistics, Department of Environmental Health, University of Cincinnati College of Medicine, Cincinnati, Ohio, USA

#### **Table of Contents**

Table S1: Adjusted regression coefficients and 95% confidence intervals of blood and urinary lead, mercury, cadmium quintiles in relation to thyroid hormones in adolescents

Table S2: Adjusted regression coefficients and 95% confidence intervals of blood and urinary lead, mercury, cadmium quintiles in relation to thyroid hormones in adults

Table S3: Adjusted regression coefficients and 95% confidence intervals of blood and urinary lead, mercury, cadmium in relation to thyroid hormones in women of reproductive age (15-44 years)

Table S4: Adjusted regression coefficients and 95% confidence intervals of cumulative exposure to lead, mercury, and cadmium in relation to thyroid hormones in adults

Supplemental Material, Table S1. Adjusted regression coefficients and 95% confidence intervals of blood and urinary lead, mercury, cadmium quintiles in relation to thyroid hormones in adolescents<sup>a</sup>

| Metal               | Quintiles  | lnTT <sub>4</sub>   | lnFT <sub>4</sub>   | lnTT <sub>3</sub>     | lnFT <sub>3</sub>     | lnTSH                 | lnTg                  |
|---------------------|------------|---------------------|---------------------|-----------------------|-----------------------|-----------------------|-----------------------|
| Pb                  | Q1 <0.53   | reference           | reference           | reference             | reference             | reference             | reference             |
| (µg/dL)             | Q2 0.53-   | -0.02 (-0.07, 0.04) | 0.01 (-0.04, 0.06)  | -0.01 (-0.05, 0.03)   | 0.01 (-0.02, 0.03)    | -0.09 (-0.22, 0.05)   | 0.10 (-0.18, 0.38)    |
|                     | Q3 0.70-   | -0.05 (-0.11, 0.01) | 0.003 (-0.04, 0.05) | 0.005 (-0.05, 0.04)   | 0.02 (-0.01, 0.04)    | -0.10 (-0.25, 0.05)   | -0.01 (-0.36, 0.34)   |
|                     | Q4 0.87-   | -0.02 (-0.09, 0.06) | 0.01 (-0.06, 0.07)  | 0.03 (-0.03, 0.08)    | 0.03 (0.002, 0.06)*   | -0.28 (-0.52, -0.04)* | 0.11 (-0.14, 0.37)    |
|                     | Q5 1.18-   | 0.002 (-0.06, 0.06) | 0.02 (-0.03, 0.06)  | 0.01 (-0.02, 0.05)    | 0.03 (-0.0001, 0.06)  | -0.12 (-0.29, 0.04)   | 0.04 (-0.21, 0.30)    |
| Total               | <LOD       | reference           | reference           | reference             | reference             | reference             | reference             |
| Hg                  | Qrt1 0.21- | -0.01 (-0.06, 0.04) | -0.02 (-0.07, 0.02) | 0.01 (-0.05, 0.06)    | 0.01 (-0.02, 0.04)    | 0.12 (-0.01, 0.25)    | 0.11 (-0.20, 0.41)    |
| (µg/L) <sup>b</sup> | Qrt2 0.45- | -0.02 (-0.07, 0.02) | 0.01 (-0.05, 0.07)  | -0.04 (-0.09, 0.01)   | -0.01 (-0.04, 0.03)   | 0.03 (-0.10, 0.17)    | -0.28 (-0.55, -0.01)* |
|                     | Qrt3 0.66- | -0.04 (-0.09, 0.02) | -0.01 (-0.05, 0.03) | -0.02 (-0.07, 0.03)   | -0.02 (-0.04, 0.01)   | -0.01 (-0.17, 0.16)   | -0.07 (-0.31, 0.18)   |
|                     | Qrt4 1.12- | -0.02 (-0.06, 0.01) | 0.02 (-0.03, 0.07)  | -0.03 (-0.06, 0.01)   | -0.02 (-0.04, 0.01)   | 0.06 (-0.06, 0.18)    | -0.02 (-0.36, 0.32)   |
| Organic             | <LOD       | reference           | reference           | reference             | reference             | reference             | reference             |
| Hg                  | Qrt1 0.21- | -0.01 (-0.06, 0.03) | 0.02 (-0.03, 0.07)  | -0.03 (-0.07, 0.01)   | -0.02 (-0.06, 0.03)   | -0.01 (-0.23, 0.22)   | -0.22 (-0.44, -0.01)* |
| (µg/L) <sup>b</sup> | Qrt2 0.34- | -0.02 (-0.08, 0.05) | -0.01 (-0.06, 0.05) | -0.05 (-0.10, -0.01)* | -0.02 (-0.05, 0.01)   | 0.02 (-0.09, 0.13)    | -0.38 (-0.67, -0.08)* |
|                     | Qrt3 0.56- | -0.03 (-0.08, 0.01) | 0.003 (-0.03, 0.04) | -0.01 (-0.05, 0.04)   | -0.01 (-0.04, 0.02)   | -0.17 (-0.21, 0.07)   | -0.07 (-0.23, 0.09)   |
|                     | Qrt4 1.04- | -0.03 (-0.08, 0.01) | 0.02 (-0.03, 0.07)  | -0.03 (-0.07, 0.00)   | -0.03 (-0.05, -0.01)* | 0.04 (-0.13, 0.21)    | -0.08 (-0.44, 0.28)   |

Supplemental Material, Table S1 (continued)

| Metal                      | Quintiles  | lnTT <sub>4</sub>               | lnFT <sub>4</sub>    | lnTT <sub>3</sub>   | lnFT <sub>3</sub>   | lnTSH                | lnTg                |
|----------------------------|------------|---------------------------------|----------------------|---------------------|---------------------|----------------------|---------------------|
| Blood                      | <LOD       | reference                       | reference            | reference           | reference           | reference            | reference           |
| Cd<br>(µg/L) <sup>b</sup>  | Qrt1 0.15- | -0.03 (-0.08, 0.01)             | -0.02 (-0.07, 0.04)  | 0.004 (-0.02, 0.03) | 0.01 (-0.02, 0.03)  | -0.06 (-0.20, 0.08)  | -0.02 (-0.47, 0.43) |
|                            | Qrt2 0.22- | 0.02 (-0.04, 0.08)              | 0.01 (-0.04, 0.06)   | 0.02 (-0.03, 0.07)  | 0.01 (-0.03, 0.05)  | -0.10 (-0.21, 0.004) | 0.09 (-0.08, 0.26)  |
|                            | Qrt3 0.26- | -0.01 (-0.05, 0.02)             | -0.004 (-0.07, 0.06) | 0.03 (-0.01, 0.06)  | 0.02 (-0.01, 0.05)  | -0.22 (-0.46, 0.02)  | 0.11 (-0.18, 0.39)  |
|                            | Qrt4 0.42- | -0.05 (-0.14, 0.04)             | -0.01 (-0.08, 0.07)  | -0.02 (-0.08, 0.05) | 0.03 (-0.01, 0.07)  | -0.07 (-0.40, 0.27)  | 0.06 (-0.65, 0.52)  |
| Urinary                    | Q1 <0.04   | reference                       | reference            | reference           | reference           | reference            | reference           |
| Cd<br>(µg/g<br>creatinine) | Q2 0.04-   | 0.08 (0.003, 0.15) <sup>*</sup> | 0.07 (-0.001, 0.13)  | 0.04 (-0.003, 0.07) | 0.02 (-0.03, 0.06)  | 0.03 (-0.25, 0.32)   | -0.35 (-0.91, 0.21) |
|                            | Q3 0.06-   | 0.05 (-0.03, 0.13)              | 0.02 (-0.04, 0.07)   | 0.02 (-0.04, 0.07)  | -0.02 (-0.09, 0.04) | -0.16 (-0.42, 0.10)  | -0.40 (-0.81, 0.02) |
|                            | Q4 0.08-   | 0.03 (-0.03, 0.11)              | 0.11 (-0.001, 0.22)  | 0.04 (-0.02, 0.11)  | 0.05 (-0.001, 0.10) | -0.28 (-0.74, 0.18)  | 0.03 (-0.37, 0.42)  |
|                            | Q5 0.11-   | 0.03 (-0.06, 0.11)              | 0.06 (-0.001, 0.13)  | 0.06 (-0.02, 0.14)  | 0.03 (-0.01, 0.08)  | 0.07 (-0.28, 0.41)   | 0.17 (-0.15, 0.48)  |

<sup>a</sup>: Adjusted for age, sex, race/ethnicity, creatinine adjusted urinary iodine, BMI z-score, and serum cotinine concentration

<sup>b</sup>: Instead of quintiles, here the reference group is exposure <LOD, and four comparison groups are categorized using quartiles of values above LOD

<sup>\*</sup>: p<0.05

Supplemental Material, Table S2. Adjusted regression coefficients and 95% confidence intervals of blood and urinary lead, mercury, cadmium quintiles in relation to thyroid hormones in adults<sup>a</sup>

| Metal                   | Quintile | lnTT <sub>4</sub>     | lnFT <sub>4</sub>   | lnTT <sub>3</sub>     | lnFT <sub>3</sub>      | lnTSH                | lnTg                |
|-------------------------|----------|-----------------------|---------------------|-----------------------|------------------------|----------------------|---------------------|
| Pb<br>(µg/dL)           | Q1 <0.85 | reference             | reference           | reference             | reference              | reference            | reference           |
|                         | Q2 0.85- | -0.01 (-0.04, 0.02)   | 0.02 (-0.01, 0.04)  | -0.01 (-0.03, 0.01)   | 0.002 (-0.02, 0.02)    | -0.04 (-0.13, 0.04)  | 0.07 (-0.03, 0.17)  |
|                         | Q3 1.19- | -0.01 (-0.04, 0.02)   | 0.02 (-0.02, 0.05)  | 0.01 (-0.03, 0.04)    | 0.01 (-0.01, 0.03)     | -0.005 (-0.08, 0.07) | 0.05 (-0.07, 0.18)  |
|                         | Q4 1.60- | 0.001 (-0.03, 0.03)   | 0.03 (0.002, 0.05)* | 0.002 (-0.02, 0.03)   | 0.02 (-0.001, 0.04)    | -0.07 (-0.16, 0.03)  | 0.10 (-0.02, 0.23)  |
|                         | Q5 2.31- | -0.01 (-0.04, 0.02)   | 0.02 (-0.01, 0.05)  | -0.004 (-0.03, 0.02)  | 0.02 (-0.001, 0.03)    | -0.04 (-0.13, 0.05)  | 0.04 (-0.06, 0.14)  |
| Total                   | Q1 <0.42 | reference             | reference           | reference             | reference              | reference            | reference           |
| Hg<br>(µg/L)            | Q2 0.42- | -0.02 (-0.04, -0.01)* | 0.01 (-0.003, 0.03) | -0.01 (-0.03, 0.01)   | -0.01 (-0.03, -0.001)* | -0.03 (-0.11, 0.05)  | -0.02 (-0.15, 0.12) |
|                         | Q3 0.71- | -0.02 (-0.05, 0.01)   | 0.002 (-0.02, 0.02) | -0.02 (-0.04, 0.01)   | -0.02 (-0.03, -0.004)* | -0.05 (-0.15, 0.05)  | 0.04 (-0.08, 0.15)  |
|                         | Q4 1.15- | -0.03 (-0.06, -0.01)* | -0.01 (-0.04, 0.02) | -0.03 (-0.06, -0.00)* | -0.02 (-0.03, -0.01)*  | -0.03 (-0.11, 0.05)  | 0.01 (-0.10, 0.11)  |
|                         | Q5 2.16- | -0.05 (-0.07, -0.02)* | -0.01 (-0.03, 0.01) | -0.07 (-0.10, -0.03)* | -0.04 (-0.05, -0.03)*  | -0.01 (-0.09, 0.07)  | -0.01 (-0.14, 0.12) |
| Organic<br>Hg<br>(µg/L) | Q1 <0.21 | reference             | reference           | reference             | reference              | reference            | reference           |
|                         | Q2 0.21- | -0.01 (-0.03, 0.01)   | 0.02 (-0.01, 0.04)  | 0.00 (-0.03, 0.03)    | -0.01 (-0.02, 0.01)    | -0.07 (-0.18, 0.03)  | -0.02 (-0.19, 0.15) |
|                         | Q3 0.42- | -0.02 (-0.04, 0.01)   | -0.01 (-0.02, 0.02) | -0.02 (-0.03, 0.004)  | -0.02 (-0.03, -0.01)*  | -0.02 (-0.11, 0.07)  | 0.03 (-0.08, 0.13)  |
|                         | Q4 0.82  | -0.03 (-0.06, 0.001)  | -0.01 (-0.04, 0.01) | -0.03 (-0.06, 0.001)  | -0.02 (-0.03, -0.01)*  | -0.01 (-0.07, 0.05)  | 0.00 (-0.11, 0.12)  |
|                         | Q5 1.76- | -0.04 (-0.06, -0.02)* | -0.01 (-0.03, 0.01) | -0.07 (-0.10, -0.03)* | -0.03 (-0.04, -0.02)*  | 0.00 (-0.07, 0.07)   | -0.02 (-0.12, 0.08) |

Supplemental Material, Table S2 (continued)

| Metal                          | Quintile | lnTT <sub>4</sub>   | lnFT <sub>4</sub>    | lnTT <sub>3</sub>   | lnFT <sub>3</sub>   | lnTSH                 | lnTg                 |
|--------------------------------|----------|---------------------|----------------------|---------------------|---------------------|-----------------------|----------------------|
| Blood                          | Q1 <0.15 | reference           | reference            | reference           | reference           | reference             | reference            |
| Cd<br>(µg/L)                   | Q2 0.15- | -0.01 (-0.03, 0.02) | 0.01 (-0.01, 0.04)   | -0.01 (-0.04, 0.01) | 0.01 (-0.01, 0.03)  | 0.06 (0.004, 0.11)*   | -0.11 (-0.26, 0.03)  |
|                                | Q3 0.27- | 0.01 (-0.02, 0.04)  | 0.02 (-0.004, 0.04)  | 0.01 (-0.02, 0.04)  | 0.004 (-0.01, 0.02) | 0.03 (-0.01, 0.07)*   | -0.12 (-0.21, -0.03) |
|                                | Q4 0.41- | 0.01 (-0.02, 0.03)  | 0.02 (-0.0002, 0.04) | 0.002 (-0.02, 0.03) | 0.003 (-0.01, 0.02) | -0.05 (-0.12, 0.03)   | 0.09 (-0.002, 0.18)  |
|                                | Q5 0.74- | 0.02 (-0.01, 0.04)  | 0.03 (0.01, 0.05)*   | 0.005 (-0.04, 0.04) | 0.004 (-0.02, 0.03) | -0.05 (-0.17, 0.07)   | 0.17 (0.04, 0.31)*   |
| Urinary                        | Q1 <0.12 | reference           | reference            | reference           | reference           | reference             | reference            |
| Cd<br>(µg/g<br>creatini<br>ne) | Q2 0.12- | 0.01 (-0.03, 0.05)  | -0.01 (-0.05, 0.03)  | 0.02 (-0.02, 0.06)  | 0.02 (0.003, 0.03)* | -0.04 (-0.17, 0.08)   | 0.04 (-0.16, 0.23)   |
|                                | Q3 0.20- | 0.01 (-0.04, 0.07)  | -0.01 (-0.06, 0.05)  | 0.04 (-0.003, 0.08) | 0.004 (-0.02, 0.03) | -0.13 (-0.22, -0.04)* | 0.14 (-0.02, 0.31)   |
|                                | Q4 0.30- | 0.05 (0.01, 0.10)*  | -0.002 (-0.04, 0.04) | 0.06 (0.02, 0.10)*  | 0.03 (0.002, 0.05)* | -0.09 (-0.23, 0.06)   | 0.25 (-0.02, 0.53)   |
|                                | Q5 0.48- | 0.04 (0.001, 0.08)* | 0.02 (-0.02, 0.06)   | 0.08 (0.05, 0.10)*  | 0.03 (0.01, 0.05)*  | -0.09 (-0.24, 0.06)   | 0.32 (0.06, 0.58)*   |

<sup>a</sup>: Adjusted for age, sex, race/ethnicity, creatinine adjusted urinary iodine, BMI value, and serum cotinine concentration

\*: p<0.05

Supplemental Material, Table S3. Adjusted regression coefficients and 95% confidence intervals of blood and urinary lead, mercury, cadmium in relation to thyroid hormones in women of reproductive age (15-44 years)<sup>a</sup>

| Metal         | lnTT <sub>4</sub>      | lnFT <sub>4</sub>    | lnTT <sub>3</sub>     | lnFT <sub>3</sub>      | lnTSH               | lnTg                |
|---------------|------------------------|----------------------|-----------------------|------------------------|---------------------|---------------------|
| ln blood Pb   | -0.02 (-0.07, 0.03)    | 0.02 (-0.03, 0.07)   | -0.01 (-0.06, 0.04)   | 0.01 (-0.03, 0.05)     | -0.04 (-0.19, 0.10) | -0.13 (-0.35, 0.09) |
| ln total Hg   | -0.03 (-0.05, -0.005)* | 0.0003 (-0.02, 0.02) | -0.04 (-0.07, -0.01)* | -0.03 (-0.04, -0.01)*  | 0.04 (-0.02, 0.09)  | 0.03 (-0.06, 0.12)  |
| ln organic Hg | -0.02 (-0.03, -0.003)* | -0.003 (-0.02, 0.01) | -0.02 (-0.04, -0.01)* | -0.01 (-0.02, -0.003)* | 0.02 (-0.01, 0.06)  | 0.01 (-0.05, 0.08)  |
| ln blood Cd   | 0.002 (-0.02, 0.02)    | -0.01 (-0.03, 0.02)  | -0.01 (-0.04, 0.01)   | -0.01 (-0.03, 0.01)    | 0.05 (-0.07, 0.16)  | 0.09 (-0.02, 0.21)  |
| ln urinary Cd | 0.04 (0.005, 0.07)*    | 0.03 (-0.01, 0.07)   | 0.04 (-0.01, 0.08)    | 0.004 (-0.02, 0.03)    | 0.05 (-0.09, 0.19)  | 0.18 (-0.09, 0.44)  |

<sup>a</sup>: Adjusted for age, sex, race/ethnicity, creatinine adjusted urinary iodine, BMI value, and serum cotinine concentration

\*: p<0.05

Supplemental Material, Table S4. Adjusted regression coefficients and 95% confidence intervals of cumulative exposure to lead, mercury, and cadmium in relation to thyroid hormones in adults<sup>a</sup>

| Pb             | Total Hg      | Cd            | lnTT <sub>4</sub>      | lnFT <sub>4</sub>    | lnTT <sub>3</sub>     | lnFT <sub>3</sub>      | lnTSH               | lnTg               |
|----------------|---------------|---------------|------------------------|----------------------|-----------------------|------------------------|---------------------|--------------------|
| ≥1.39<br>μg/dL | ≥0.88<br>μg/L | ≥0.33<br>μg/L |                        |                      |                       |                        |                     |                    |
| Yes            | Yes           | Yes           | -0.02 (-0.06, 0.02)    | 0.01 (-0.02, 0.04)   | -0.02 (-0.05, 0.01)   | -0.01 (-0.03, 0.01)    | -0.03 (-0.12, 0.06) | 0.22 (0.04, 0.39)  |
| Yes            | Yes           | No            | -0.05 (-0.09, -0.004)* | -0.01 (-0.04, 0.02)  | -0.04 (-0.07, -0.02)* | -0.01 (-0.03, 0.01)    | -0.05 (-0.15, 0.04) | 0.03 (-0.11, 0.18) |
| Yes            | No            | Yes           | -0.0004 (-0.04, 0.04)  | 0.01 (-0.02, 0.04)   | 0.01 (-0.02, 0.04)    | 0.01 (-0.02, 0.04)     | -0.10 (-0.22, 0.02) | 0.24 (0.11, 0.37)  |
| Yes            | No            | No            | -0.02 (-0.06, 0.01)    | 0.001 (-0.03, 0.03)  | 0.01 (-0.02, 0.03)    | 0.01 (-0.02, 0.03)     | 0.004 (-0.11, 0.12) | 0.07 (-0.07, 0.21) |
| No             | Yes           | Yes           | -0.04 (-0.08, 0.002)   | -0.01 (-0.04, 0.02)  | -0.04 (-0.07, -0.01)* | -0.02 (-0.04, 0.01)    | -0.05 (-0.21, 0.10) | 0.17 (0.02, 0.32)  |
| No             | Yes           | No            | -0.04 (-0.07, -0.004)* | -0.02 (-0.04, 0.01)  | -0.03 (-0.06, -0.01)* | -0.02 (-0.03, -0.002)* | 0.02 (-0.08, 0.12)  | 0.11 (-0.02, 0.25) |
| No             | No            | Yes           | -0.02 (-0.05, 0.01)    | -0.003 (-0.03, 0.03) | 0.002 (-0.03, 0.04)   | -0.01 (-0.04, 0.02)    | -0.03 (-0.19, 0.13) | 0.19 (0.02, 0.36)  |
| No             | No            | No            | reference              | reference            | reference             | reference              | reference           | reference          |

<sup>a</sup>: Adjusted for age, sex, race/ethnicity, creatinine adjusted urinary iodine, BMI value, and serum cotinine concentration

\*: p<0.05
